# Supplementary material for: Characterization of adenine phosphoribosyltransferase (APRT) activity in Trypanosoma brucei brucei: Only one of the two isoforms is kinetically active
Source: PubMed Central journal article supplement (PMC8836349; doi:10.1371/journal.pntd.0009926), 2022-02-01
Supplement: pntd.0009926.s001.pdf [file pntd.0009926.s001.pdf]

**S1 Appendix. Optimized sequences of APRT1 and APRT2, showing the ORFs used for heterologous expression in *P. pastoris*, with N and C terminal overhangs used for cloning into pPICZ vectors (underlined).**

>APRT1\_opt\_Ntag

tgtacttccaaagcggtagcatgagtccttggtgagggtttgcctaactattttacattgtctaa  
ggattcaccattgagaaagaagttcgagaaagtctataagtggtagctctccagctttttctcct  
catgatggtccaagattcgctgaagttggtaacattactgaaaatcctgagggttatgagaggta  
tcagagatttctttggtgatagatacaagaacttgcaacaaccaatcactcacattttgggttt  
tgattctagagggttcttggtgggtcctatgattgctggtgaattgaacgttccattcgttttg  
attagaaaggctaacaagattgctgggtgttattattaagtctgagccttacactaaagaatatg  
ctgctgagtcgaagagtgtagactggttagattcggttctttcgataagaactctagagttgt  
tttgatcgatgatgttattgctactgggtggtactatggtggctgggtgttcaattgggtgatgct  
tgtgggtgctactttgggtgagggtgctgggtatttgggtttgactttcttgaaagggtactcaac  
ctgctcactttcgctgggtggttagataactctaacgttccattcgttactttgggtgatgaaac  
tgttttgtctgatgagaattgtgggtgaccattgcaccacaaaggaagtagaattattagttgc  
gctgaagccaagaagttgattttgagttttgtagccttagaca

>APRT2\_opt\_Ntag

tgtacttccaaagcggtagcatgagtcagtagatgctatccttaccgaaagacacccacacca  
cttcacccttgccgacacccaccacttgctaaagaacttcacgctaacatttttgggagagtct  
gatttgactcatgctaattgtgctcacggttacgatatttcttctttgactgaaaagccagctt  
tgtttagaaaagttattgagttcttgaagtgtagatacgaactatgggagatactggtcctac  
tcatattattgggtgttgagtctagagggttatattattgggtgctccattggctggttgggt  
attccttttggtactgctagagttactaagagatttccatcttctttcgttcctgaaggagatg

atttgaagtatttgccaatgtctagatctatcagaaacgattctattccacctagagctagagt  
tttgattggtgatgatttcattggtactgggttctactatggtggctgctttgagattggctgat  
attgttgctgctcaagttggtgaggttttgactgtttgatggtgcttctttgggtggtatta  
aatcatcagagaatctgatgatgagatggtcaaggaaactcctatTTTTactttgatccactt  
caaattgtctcctagagaagcagaagagcagttggagttcgtcaacagttacatcacaagaagt  
agattgtgagttttagccttagaca

>APRT1\_opt\_Ctag

gaagctagcctcgagccaccatgagtccttggtgaggtttgcctaactattttacattgtctaa  
ggattcaccattgagaaagaagttcgagaaagtctataagtggactctccagctttttctcct  
catgatgttccaagattcgctgaagttggtaacattactgaaaatcctgaggttatgagaggta  
tcagagatttctttggtgatagatacaagaacttgcaacaaccaatcactcacattttgggtt  
tgattctagaggttcttggtgggtcctatgattgctggtgaattgaacgttccattcgttttg  
attagaaaggctaacaagattgctgggtgttattattaagtctgagccttactaaagaatatg  
ctgctgagtcgaagagtgatgactggttagattcggttctttcgataagaactctagagttgt  
tttgatcgatgatgttattgctactgggtggtactatggtggctgggtgtcaattgggtgatgct  
tgtggtgctactttgggtgaggtgctggtatTTTgggttgactttcttgaaaggtactcaac  
ctgctcactttcgctggtggttagataacttaacgttccattcgttactttggttgatgaaac  
tgTTTTgtctgatgagaattgtggtgaccattgcaccacaaaggaagtagaattattagttgc  
gctgaagccaagaagttgattggtaccagcgaaaacctgt

>APRT2\_opt\_Ctag

gaagctagcctcgagccaccatgagtcagtatgatgctatccttaccgaaagacacccacacca  
cttcacccttgccgacacccaccacttgctaaagaacttcacgctaacatttttgagagctt  
gatttgactcatgctaattgtgctcacgtttacgatatttcttctttgactgaaaagccagctt

tgtttagaaaagttattgagttcttgaagtgtagatacgaactatgggagatactggtcctac  
tcatattattgggtgttgagtctagaggttatattattgggtgctccattggctggtgctttgggt  
attccttttgttactgctagagttactaagagatttccatcttctttcgttcctgaaggagatg  
attgaagtatttgccaatgtctagatctatcagaaacgattctattccacctagagctagagt  
tttgattggtgatgatttcattgggtactggttctactatgttggctgctttgagattggctgat  
attggtgctgctcaagttggtgaggttttgactggttgatggtgcttctttgggtggtatta  
aatcatcagagaatctgatgatgagatggtcaaggaaactcctatttttactttgatccactt  
caaattgtctcctagagaagcagaagagcagttggagttcgtcaacagttacatcacaagaagt  
agattgggtaccagcgaaaacctgta
