# Supplementary material for: Characterization of adenine phosphoribosyltransferase (APRT) activity in Trypanosoma brucei brucei: Only one of the two isoforms is kinetically active
Source: PubMed Central journal article supplement (PMC8836349; doi:10.1371/journal.pntd.0009926), 2022-02-01
Supplement: pntd.0009926.s002.pdf [file pntd.0009926.s002.pdf]

**S2 Appendix. Primers used for linearization of plasmids pET-28a(+)::aprt1-Ntag, pET-28a(+)::aprt1-Ctag, pET-28a(+)::aprt2-Ntag and pET-28a(+)::aprt2-Ctag prior to cloning into pPICZ vectors.**

pPICZ Ntag:

Fwd: 5'-GTACTTCCAAAGCGGTACC-3'

Rev: 5'-TGAGTTTGTAGCCTTAGACATGACTGTTTCCTCAG-3'

pPICZ Ctag:

Fwd: 5'-GCTGTCTTGGAACCTAATATG-3'

Rev: 5'-TGTCAGTTTTGGGCCATTTG-3'
