# Supplementary material for: Characterization of adenine phosphoribosyltransferase (APRT) activity in Trypanosoma brucei brucei: Only one of the two isoforms is kinetically active
Source: PubMed Central journal article supplement (PMC8836349; doi:10.1371/journal.pntd.0009926), 2022-02-01
Supplement: pntd.0009926.s004.pdf [file pntd.0009926.s004.pdf]

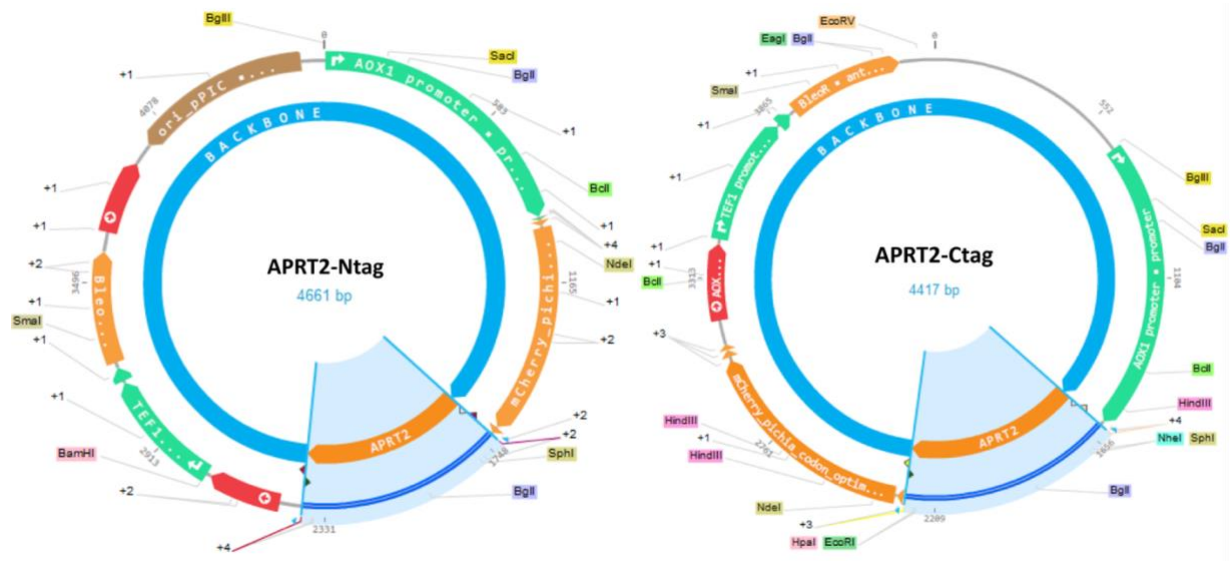

**S2 Fig. Vector maps of APRT2-Ntag (left) and APRT2-Ctag (right).** *P. pastoris* expression vector pPICZ maps, showing the *aprt2* gene insert position, and location of mCherry tags.
