# Supplementary material for: Characterization of adenine phosphoribosyltransferase (APRT) activity in Trypanosoma brucei brucei: Only one of the two isoforms is kinetically active
Source: PubMed Central journal article supplement (PMC8836349; doi:10.1371/journal.pntd.0009926), 2022-02-01
Supplement: pntd.0009926.s005.pdf [file pntd.0009926.s005.pdf]

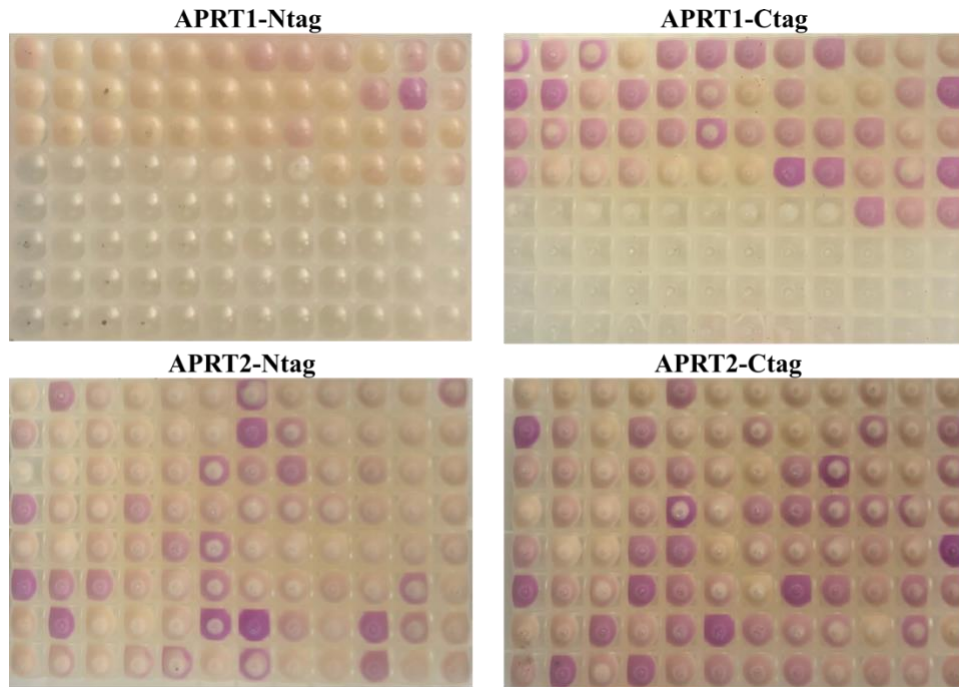

**S3 Fig. Small scale expression screen of recombinant APRT1 and APRT2 in *P. pastoris*, co-expressed with mCherry.** The highest expressing clones were selected based on mCherry expression levels (magenta color).
