# Supplementary material for: Characterization of adenine phosphoribosyltransferase (APRT) activity in Trypanosoma brucei brucei: Only one of the two isoforms is kinetically active
Source: PubMed Central journal article supplement (PMC8836349; doi:10.1371/journal.pntd.0009926), 2022-02-01
Supplement: pntd.0009926.s006.pdf [file pntd.0009926.s006.pdf]

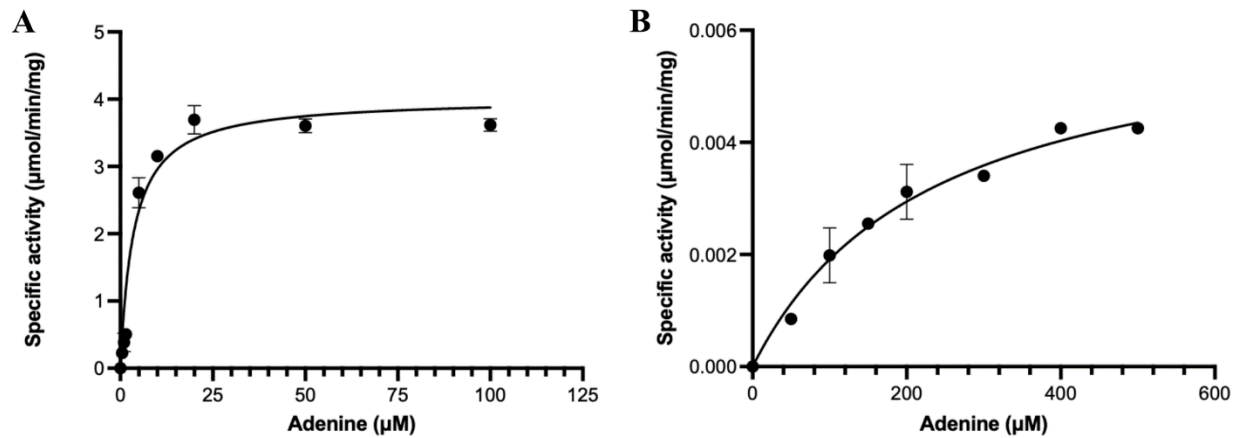

**S4 Fig. Initial velocity data of APRT1 and APRT2 at apparent saturating concentrations of PRPP (1mM). The scale of the y-axis is significantly smaller for APRT2 when compared to APRT1.**
