# Supplementary material for: Characterization of adenine phosphoribosyltransferase (APRT) activity in Trypanosoma brucei brucei: Only one of the two isoforms is kinetically active
Source: PubMed Central journal article supplement (PMC8836349; doi:10.1371/journal.pntd.0009926), 2022-02-01
Supplement: pntd.0009926.s008.pdf [file pntd.0009926.s008.pdf]

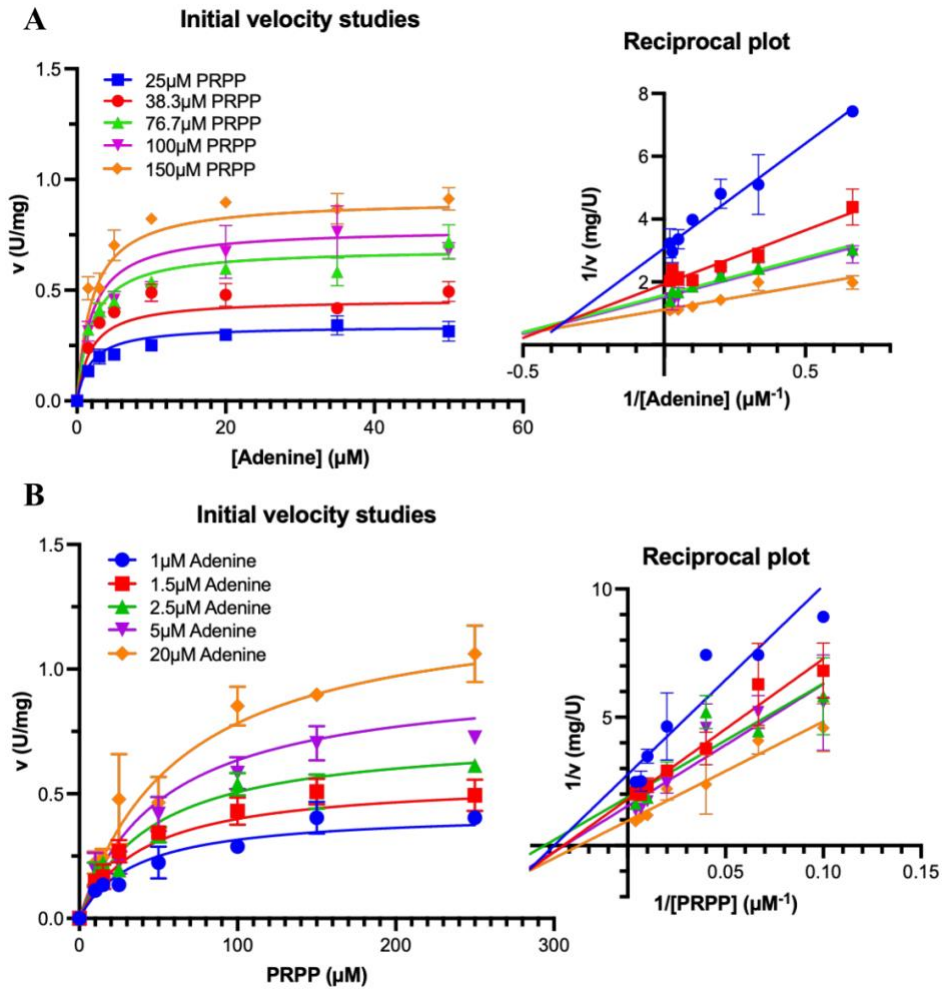

**S6 Fig. Bi-substrate kinetics of APRT1 forward reaction.** (A) Initial velocities of APRT1 at fixed-changed PRPP concentrations, varying substrate adenine. (B) Initial velocities of APRT1 at fixed-changed adenine concentrations, varying substrate PRPP. Data Insets shows double reciprocal plots of A and B.
