# Supplementary material for: Characterization of adenine phosphoribosyltransferase (APRT) activity in Trypanosoma brucei brucei: Only one of the two isoforms is kinetically active
Source: PubMed Central journal article supplement (PMC8836349; doi:10.1371/journal.pntd.0009926), 2022-02-01
Supplement: pntd.0009926.s009.pdf [file pntd.0009926.s009.pdf]

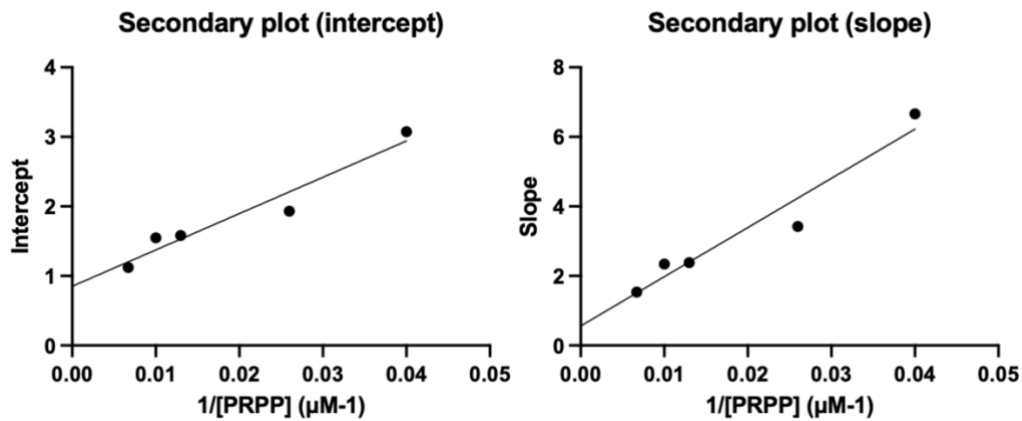

**S7 Fig. Secondary reciprocal plots** from initial velocity data with fixed and changed PRPP concentrations, varying substrate adenine. An apparent  $K_{ia}$  value was obtained with the secondary replot of the initial velocity double reciprocal slopes (right), shown in S5 Fig, where  $slope = K_{ia}K_b/V_{max}$ . Apparent  $K_{ia}$  was used as starting parameter for the global fitting of the initial velocity data using Eq (2), as described under Methods.
