# Supplementary material for: Characterization of adenine phosphoribosyltransferase (APRT) activity in Trypanosoma brucei brucei: Only one of the two isoforms is kinetically active
Source: PubMed Central journal article supplement (PMC8836349; doi:10.1371/journal.pntd.0009926), 2022-02-01
Supplement: pntd.0009926.s010.pdf [file pntd.0009926.s010.pdf]

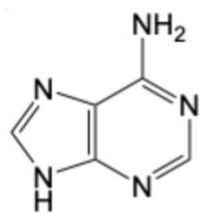

Adenine

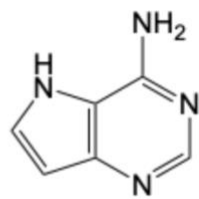

9-deazaadenine

**S8 Fig. Structure of adenine (left) and 9-deazaadenine (right).**
