# Supplementary material for: Characterization of adenine phosphoribosyltransferase (APRT) activity in Trypanosoma brucei brucei: Only one of the two isoforms is kinetically active
Source: PubMed Central journal article supplement (PMC8836349; doi:10.1371/journal.pntd.0009926), 2022-02-01
Supplement: pntd.0009926.s011.pdf [file pntd.0009926.s011.pdf]

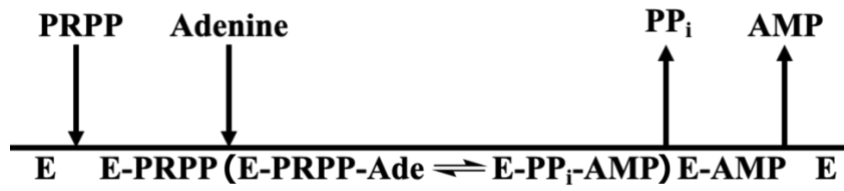

**S9 Fig. Ordered Bi Bi kinetic mechanism of APRT1 as obtained from initial velocity and dead-end inhibition studies.**
