# Supplementary material for: Characterization of adenine phosphoribosyltransferase (APRT) activity in Trypanosoma brucei brucei: Only one of the two isoforms is kinetically active
Source: PubMed Central journal article supplement (PMC8836349; doi:10.1371/journal.pntd.0009926), 2022-02-01
Supplement: pntd.0009926.s015.pdf [file pntd.0009926.s015.pdf]

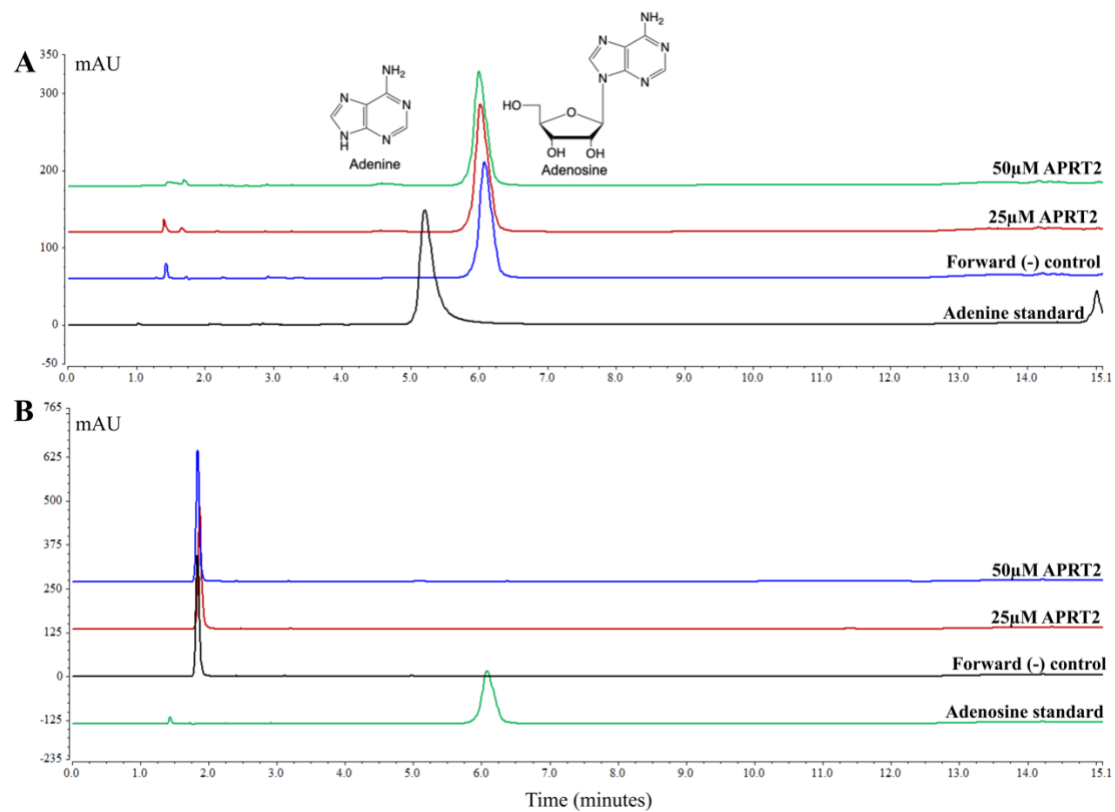

**S13 Fig. APRT2 Type 1 PRTase activity tests using alternative N-containing nucleophiles – part 2.** APRT2 was tested for activity as a potential adenosine phosphorylase, EC 2.4.2.1 (**A**), and 5'-nucleotidase, EC 3.1.3.5 (**B**). No enzymatic activity could be detected under the assay conditions described in the Methods.
