# Supplementary material for: Characterization of adenine phosphoribosyltransferase (APRT) activity in Trypanosoma brucei brucei: Only one of the two isoforms is kinetically active
Source: PubMed Central journal article supplement (PMC8836349; doi:10.1371/journal.pntd.0009926), 2022-02-01
Supplement: pntd.0009926.s016.pdf [file pntd.0009926.s016.pdf]

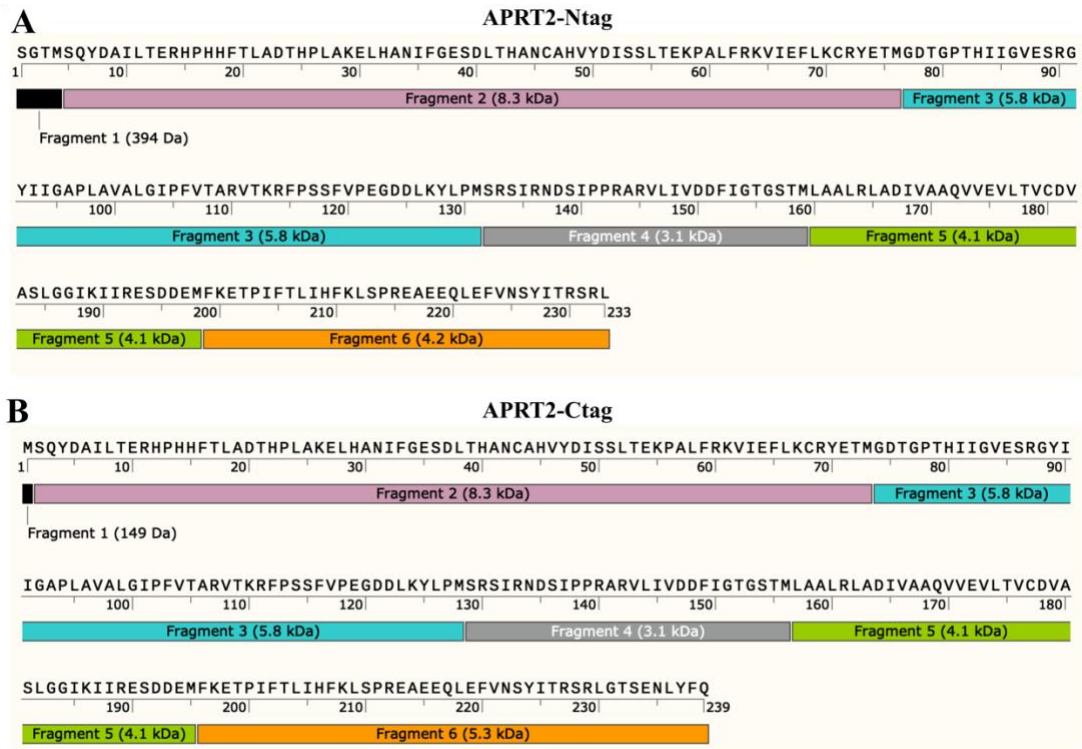

**S14 Fig. Expected fragments of APRT2 with no MetO modifications treated with cyanogen bromide.** Cyanogen bromide selectively cleaves peptides at the C-terminus of reduced methionine residues. APRT2 contains five Met residues and when all Met residues are reduced, 6 fragments are produced. The molecular weight of all 6 fragments expected for APRT2-Ntag (**A**) and APRT2-Ctag (**B**) are depicted on each fragment.
